# Supplementary material for: Linkage to chromosome 2q32.2-q33.3 in familial serrated neoplasia (Jass syndrome)
Source: PubMed Central journal article supplement — Fam Cancer. 2010 Dec 17;10(2):245–54. doi: 10.1007/s10689-010-9408-8 (PMC3100490; doi:10.1007/s10689-010-9408-8), 2010-12-17
Supplement: 10689_2010_9408_MOESM1_ESM.pdf [file 10689_2010_9408_MOESM1_ESM.pdf]

Supplementary Table 1: Markers and primers used for finemapping

| Chr  | Marker  | Gen pos † | Phys pos † | Forward primer sequence    | Reverse primer sequence   |
|------|---------|-----------|------------|----------------------------|---------------------------|
| 2p   | D2S2584 | 1.95      | 0.17       | TGCAGATTAGACCTCTGTAACACAC  | TTCTAGATCTCCCAGAAAATACCT  |
| 2p   | D2S323  | 4.52      | 2.11       | TACAGAAAAGTTGTCTGCTACACC   | CCATAGTGACTTCAGACCATTGATT |
| 2p   | D2S319  | 7.60      | 3.43       | CAGACCATGACAGGCTATGTGTA    | GGTTTGAGAGATGTTAGTCAAAGGA |
| 2p   | D2S304  | 10.64     | 4.67       | TGTCCAGAGAACAGAAGCAAGA     | CCCAGTCTCCATAATCACATCA    |
| 2p   | D2S281  | 15.19     | 6.66       | CTGTGCACCTTGTCTATTCCCTAAT  | CTACCCTTCATAATCACAGGAGCTA |
| 2p   | D2S1329 | 19.11     | 7.85       | CTCAAATACCAGGAATCTCATTGAG  | TAGAGTGGAAGTCTTGCTGTTTTTC |
| 2p   | D2S2164 | 20.00     | 8.23       | AACCACTCTCCTCTGTCTCTGTCT   | AGAGAGCCATTACAGATTCACTGAC |
| 2p   | D2S2326 | 22.73     | 8.76       | AGTCCTTGTACATTGATGAACC     | TCTCTTGGATTTAAGGAAGGAGGT  |
| 2p   | D2S423  | 25.44     | 9.94       | GTTCCACTCAAGCATAGATGAGC    | TGCCTGAATTTCTCCCATTCT     |
| 2p   | D2S2377 | 29.66     | 11.80      | GCCATATATTACGTAACACCCTTAGC | ACAGTAATTCAGGTCAGCAAGAATG |
| 2p   | D2S262  | 30.23     | 11.90      | GTGGTAATGCTATCCAGTTATGAGC  | GTTCACTTGTTTATCTGCTGACCTT |
| 2p   | D2S2267 | 34.47     | 13.74      | TGATGTGTCTTTCTGAAGCTG      | CTCATAGCTTTACTTAATGGGCAAG |
| 2q   | Clen55  | 159.79    | 150.03     | CCTGGACCCAGCTATGCTCATT     | AAGGAAGATGAAAGGACAAAGAGGT |
| 2q   | Clen53  | 168.10    | 160.45     | GGGTCCTGTTTAGACTAGAGATACA  | CCGCCTTCTATCTTTCTTAATTGCT |
| 2q   | Clen46  | 177.43    | 171.39     | GAGGCAGAGTGCAGTCTTTTGTGTT  | TGTGAAAGGGTAAACCAACCTGGAT |
| 2q   | Clen45  | 179.52    | 173.38     | ATCGATTTAGGGTTAGAGATGAACA  | AAAAACAGGACCTTCTCTCTCCCTT |
| 2q   | D2S2310 | 186.57    | 181.87     | GACTGCTTTAATAGCTAGAGAACCA  | TTATTCAACCCTCGACTTGAGTAGA |
| 2q † | D2S118  | 190.98    | 191.31     |                            |                           |
| 2q † | D2S117  | 194.63    | 195.33     |                            |                           |
| 2q   | D2S115  | 196.51    | 198.68     | CAAGAACAGCCATATTGACTTGAAC  | GGGTACAGCCCATGTGTGAG      |
| 2q   | D2S309  | 198.66    | 201.64     | GCTCTAGTAGGCTGGTTACATAA    | TTCCAAGAATAATGCAATCTCAG   |
| 2q   | D2S2309 | 199.20    | 202.33     | TGTCAGGCACTTCGCTA          | TGCTTCTTATTGTACCCAAA      |
| 2q   | D2S2214 | 199.28    | 202.44     | GTCTTGCCACAATCACCC         | AGCAAACAGTTTTGAGGACAT     |
| 2q   | D2S346  | 199.77    | 202.67     | TCAGGATGGGAGCAGA           | CTGTGAGAATTAATGAGTTACAA   |
| 2q   | D2S105  | 200.83    | 204.50     | CTCTACAGTTTATAACCAGC       | TACTGTTGATTCATATTCCC      |
| 2q   | D2S1271 | 200.93    | 204.68     | GGAAGGTCCAGATTAGAAG        | AAGGGAAATAAAGAGAAGCAT     |
| 2q   | D2S2237 | 202.01    | 205.34     | CAGAATGCCTGTCTGTCCA        | GGCAAGTTGGCTACCTGACC      |
| 2q † | D2S2358 | 204.25    | 207.24     |                            |                           |
| 2q † | D2S2382 | 213.82    | 216.76     |                            |                           |
| 2q † | D2S163  | 221.36    | 220.50     |                            |                           |

|                 |         |        |        |                           |                            |
|-----------------|---------|--------|--------|---------------------------|----------------------------|
| 2q <sup>+</sup> | D2S133  | 227.17 | 224.34 |                           |                            |
| 2q              | D2S401  | 230.67 | 227.97 | GAAGTTGCAGAACCATATAAACTCA | TATGTCTGCTGCAGCTTGTGGTAGT  |
| 2q              | D2S341  | 235.25 | 230.58 | TTAATCCTTCCCAGAACCTTAGTGT | CAGCAGTAAACCTTTTTGTATCCTG  |
| 2q              | D2S1279 | 240.25 | 233.95 | GGGCTTCTAGTAAAGGTCTGTTTGT | GAGAATCACTTGAACCCAGGAG     |
| 3q              | D3S1303 | 126.07 | 119.64 | GGTATCATATCACACACCAGATCAA | GCTGAGCAAAGAGGTCTTAGAATA   |
| 3q              | D3S1589 | 133.17 | 127.43 | TGTGACACCTCAGCACTATACACTT | GCCCTCCCCTTTATAGAGATACAT   |
| 3q              | D3S1238 | 142.60 | 135.40 | TACATAATAAAGCTGAGTGCGGTGT | TGTGTATGGGCTCTTGAAATTG     |
| 3q              | D3S1576 | 144.46 | 138.90 | CAACTGTAGCAACTGTCTCTGTCTC | GAGAGGAAAAGGGGTATAACAAGAA  |
| 3q              | D3S1557 | 152.31 | 146.65 | GACGTGCTGATAATAAATTCACTCC | AGACGTGAAGAAGGAAGACAATAAG  |
| 3q              | D3S3705 | 157.53 | 150.53 | CCTAGGCAATTTTGAATCTCTTCC  | CGTTGCTTTATTTAGTACTGTGTCC  |
| 3q              | D3S1237 | 161.34 | 153.64 | TTATAGACCTTCTGCAAGTTTCTG  | CTATGGAGCTTGCTAAAACAGTACC  |
| 3q              | D3S3579 | 166.45 | 162.06 | GAGAGGGCAGTCTTACATAGGAGAT | CTCACTGGGGATTTGACAGTATTAG  |
| 3q              | D3S3668 | 167.47 | 165.83 | TCTATCCTGTCTCTCTAAACATGG  | CATTTGCCAATTTCCAAC         |
| 3q              | D3S1243 | 169.98 | 169.84 | TTGTTACCAATGTTTTGCTTGA    | TCAGGAATCCATATCTCCACTCTTA  |
| 3q              | D3S3725 | 174.44 | 173.29 | AATATTACTCACAGTGCCTGACTT  | CTATTTGAGGCAATCTAAAGCCATC  |
| 3q              | D3S2412 | 183.07 | 178.55 | ATGCTTCTCACCTCCACAA       | AGAAATAAGCAGGTAGATCCCAGAC  |
| 3q              | D3S3583 | 190.37 | 185.77 | CTCTCCCAGTAACTCTTCTCTACC  | CCCTGACATGGTGAAGTATCAAT    |
| 7q              | D7S666  | 111.42 | 101.54 | TAGTGCTAAACTCTTCTGCCTTCT  | ACTCCCTGATATGTGAGGTAATGAA  |
| 7q              | D7S2459 | 117.72 | 107.12 | CTTATCTTCCCAACACAGAAAGAAC | GCCTTAGTAAAACCCATTTGAAGAC  |
| 7q              | D7S3052 | 118.93 | 109.17 | ATCTATTCTCAGCCTCATTGACT   | AAAGTGAGACTAGCAGATGTACTTGG |
| 7q              | D7S2554 | 121.75 | 114.24 | TGTGATAGGGATGGGATGGT      | GCTACACCATGTATTGTTTATGCAC  |
| 7q              | D7S685  | 125.46 | 121.08 | ATGTTTGATCTACGCTCATCA     | TCCCTAACTTAATCAATGAGACCAG  |
| 7q              | D7S648  | 127.02 | 123.64 | AGACTCTCTCTCTTCTGTGTATG   | TCATAGGGTTTCTATATCGATGGAC  |
| 7q              | D7S2501 | 129.10 | 127.30 | TGCTCTTCTCACTTTCACCTATTT  | GATCGCAGACAGTAACTTCTTACC   |
| 8p              | D8S1786 | 39.17  | 22.43  | CCTTGTTTGCAGACTGTTTTGA    | TGAGCCCAAAGAGGAGAATAAAC    |
| 8p              | D8S1725 | 43.74  | 25.10  | GGTCAGGCTTAGAGATCTAGTTTTT | AAACACAAACACCTACCAAGGACT   |
| 8p              | D8S1048 | 46.42  | 26.81  | ACTACAGGCTGAATGACAGAATGA  | GTTGCAGCCAAATTGTGACTAA     |
| 8p              | D8S1809 | 47.81  | 28.19  | TGGGCACTTTAGGATGTTTACTG   | CAGATCAGAATCCTGTGAGTTAGT   |
| 8p              | D8S339  | 52.12  | 30.36  | GACAACAAAGTGCTGTGTGATTCTG | CCTATATACCTTTGCACAGATTTTC  |
| 8p              | D8S1777 | 54.57  | 35.35  | CTTGCGATTTTAGACATATCTAGCC | TACCTATATCCCTCACTCAGTTCCA  |
| 8q              | D8S531  | 62.26  | 49.02  | TGGAGTCTTCTTATGTTGTTTAGGC | CTACAGATTCACAGAGGAATGATTG  |
| 8q              | D8S285  | 68.31  | 57.07  | TCACACAGAATCTTTGCTACCTACA | TCTGCATCTGAAAAACGTATGG     |
| 8q              | D8S1763 | 71.87  | 60.10  | GCTCAAAGATTACTCAAAGGACTTG | ATGAAAGCCTTTATCTACAGGTGTG  |

|    |         |        |        |                           |                             |
|----|---------|--------|--------|---------------------------|-----------------------------|
| 8q | D8S543  | 79.78  | 70.01  | TGTCATTGCTTTCTAGTCTGTCTCA | GTGGATATAGAAAAGATGCACAGG    |
| 8q | D8S1807 | 83.68  | 72.55  | TTATCGCCTGTCCCTAGTTCTTT   | GAGGACCCCTACACTGCTGCTAATA   |
| 8q | D8S1805 | 89.45  | 78.09  | TTTGATCAATCTTAGCTCCACCTC  | GAATTTACATCTCTGGCTCTCACAG   |
| 9q | D9S1879 | 65.58  | 70.65  | TCATCCCCTCTCATTCCCTA      | ACCCTCTCATCCATCCCTTC        |
| 9q | D9S1876 | 68.30  | 74.42  | CAGTGGTAATCTCCAGGAAGC     | CTCTGTCCCTCTAGAAATCACACAT   |
| 9q | D9S1674 | 74.35  | 79.11  | TATTTCTGTTGTGTTAGGGTTCTCC | ACCCTGTAGACTGACTTTGAACTTG   |
| 9q | D9S933  | 78.26  | 82.83  | TCCCCACATCACTCAAAGATACTAA | TTGTCAACCTCTGTCTGTCTATATGTC |
| 9q | D9S1790 | 84.06  | 87.10  | GGGGATCTTAAGCAAGTCATTTTAC | GAATGCATAACTTGTAGCAAGGAAG   |
| 9q | D9S1781 | 95.32  | 93.46  | AAATTTCTTGGTGAGGTTACTCCTG | TGTATAGTAGTGGAGTCTGGGCTTC   |
| 9q | D9S1809 | 98.70  | 97.60  | AGGCAAGAGTGGAGCATATGTGTA  | CGAATTAAGGTTTGTGCTTCCT      |
| 9q | D9S176  | 102.68 | 101.10 | GGAAACTAGATGACTGCTCAGTGTA | ATCATAGGCTCTACATCCCTCAG     |
| 9q | D9S1162 | 109.77 | 109.19 | GAGCCACAGTAAACCACTAGAGAC  | GAAGTGTGAGGGACTGAGGAAG      |
| 9q | D9S1683 | 115.35 | 112.90 | CACAAGATAGTCAAGCAAGATGAAG | TGGTCTAGCTGCAGTAAGTTTTCTC   |
| 9q | D9S51   | 121.49 | 116.90 | AGTTGAGAAAACCAAGGTTGAGTG  | GGGTACCAATTCCAAGTAAAAAGT    |

\* deCODE genetic map position in cM [37]

† Physical position in Mb

‡ Primers from ABI Prism Linkage Mapping Set v2.5 (Applied Biosystems); primer sequences not available

Supplementary Table 2: Details of families and results for finemapping at 2q24.3-q37.1

| Family | No. affected | Genotyped |       | Max Aff only LOD | Location (cM)      | Max NPL      | Location (cM)      | Location of segregating haplotype (cM) | Affecteds sharing haplotype |
|--------|--------------|-----------|-------|------------------|--------------------|--------------|--------------------|----------------------------------------|-----------------------------|
|        |              | Affected  | Total |                  |                    |              |                    |                                        |                             |
| 1      | 9            | 8         | 32    | 1.53             | 179-240            | 2.15         | 168-240            | 168-235                                | 8/9                         |
| 2a*    | 5            | 4         | 6     | 0.13             | 179-201            | 0.42         | 177-202            | 168-202                                | 3/3 <sup>†‡</sup>           |
| 2b*    | 11           | 9         | 25    | 0.47             | 181-190            | 0.87         | 180-214            | -                                      | -                           |
| 3      | 11           | 10        | 19    | 1.11             | 220-240            | 1.45         | 214-240            | 214-240                                | 9/10 <sup>‡</sup>           |
| 4      | 8            | 8         | 21    | -ve              | -                  | 0.38         | 227-240            | -                                      | -                           |
| 5      | 9            | 8         | 20    | 1.43             | 181-226            | 1.19         | 180-231            | 180-227                                | 8/9                         |
| 6      | 4            | 4         | 13    | 0.41             | 192-235            | 1.22         | 191-235            | 191-240                                | 4/4                         |
| 7      | 6            | 4         | 15    | 0.01             | 187-201            | 0.92         | 180-201            | -                                      | -                           |
| 8      | 5            | 5         | 15    | 0.72             | 181-240            | 1.83         | 186-240            | 180-240                                | 5/5                         |
| 9      | 7            | 7         | 19    | -ve              | -                  | 1.55         | 197-199            | -                                      | -                           |
| 10     | 7            | 6         | 11    | 0.33<br>0.18     | 160-210<br>225-229 | 0.80<br>0.90 | 160-214<br>221-231 | 160-214                                | 6/7                         |
| 11     | 6            | 6         | 10    | 0.04             | 198-203            | 0.95         | 177-214            | 195-214                                | 5/6                         |
| Total  | 88           | 79        | 206   |                  |                    |              |                    |                                        |                             |

\* Includes 5 individuals (4 affected, 1 unaffected, all genotyped) who were counted as part of both Family 2a and Family 2b

† Haplotypes could not be assigned for one affected individual

‡ Affected spouses excluded
